# Supplementary material for: Survival signalling by Akt and eIF4E in oncogenesis and cancer therapy
Source: Springer Nature journal article supplement (doi:10.1038/nature02369), 2004-03-01
Supplement: 41586_2004_BFnature02369_MOESM8_ESM.pdf [file 41586_2004_BFnature02369_MOESM8_ESM.pdf]

## Supplementary Table 1:

### Immunophenotype of tumours expressing E $\mu$ -myc

(Control), *E $\mu$ -myc/bcl-2*, *E $\mu$ -myc/akt* and *E $\mu$ -myc/eIF4E*.

| Antigen                | Control  | Bcl-2    | Akt      | eIF4E    |
|------------------------|----------|----------|----------|----------|
| <u>B-cell antigens</u> |          |          |          |          |
| CD45R                  | Pos      | Pos      | Pos      | Pos      |
| CD19                   | Pos      | Neg      | Neg/Weak | Pos      |
| IgM                    | Pos      | Neg      | Neg      | Variable |
| Igk                    | Pos      | Neg      | Neg      | Pos      |
| CD23(Fc $\epsilon$ R)  | Neg      | Neg      | Neg      | Neg      |
| CD138                  | Variable | Neg/Weak | Neg      | Variable |
| <u>T-cell antigens</u> |          |          |          |          |
| CD3                    | Neg      | Neg      | Neg      | Neg      |
| TCR $\alpha/\beta$     | Neg      | Neg      | Neg      | Neg      |
| TCR $\gamma/\delta$    | Neg      | Neg      | Neg      | Neg      |
| CD4                    | Neg      | Pos      | Pos      | Neg      |
| CD5                    | Neg      | Neg      | Pos      | Neg      |
| CD8a                   | Neg      | Neg/Weak | Neg      | Variable |

Myeloid antigens

|                |          |          |      |          |
|----------------|----------|----------|------|----------|
| Ly-6G (Gr-1)   | Neg      | Pos      | Neg  | Neg      |
| CD11b (Mac-1)  | Neg/Weak | Neg/Weak | Weak | Variable |
| Ly-76 (TER119) | Neg      | Neg      | Neg  | Neg      |
| Ly-71 (F4/80)  | Neg      | Neg      | Pos  | Neg      |
| CD41           | Neg      | Neg      | Neg  | Neg      |

Lineage non-specific antigens

|      |     |     |     |     |
|------|-----|-----|-----|-----|
| CD45 | Pos | Pos | Pos | Pos |
|------|-----|-----|-----|-----|

*Early antigens*

|                 |          |     |          |     |
|-----------------|----------|-----|----------|-----|
| CD34            | Neg      | Neg | Neg/Weak | Neg |
| Ly-6A/E (Sca-1) | Neg      | Pos | Pos      | Neg |
| CD90 (Thy1)     | Variable | Pos | Variable | Neg |
| CD117 (c-Kit)   | Neg      | Neg | Neg      | Neg |

*Additional antigens*

|                               |          |          |          |          |
|-------------------------------|----------|----------|----------|----------|
| CD16/32 (FC $\gamma$ RII/III) | Pos      | Variable | Pos      | Pos      |
| CD31 (PECAM)                  | Pos      | Pos      | Pos      | Pos      |
| CD43                          | Pos      | Pos      | Variable | Pos      |
| CD59 (Ly-6C)                  | Neg/Weak | Pos      | Pos      | Variable |
| CD69                          | Neg      | Neg      | Neg      | Pos      |
| CD71 (Transferrin Receptor)   | Pos      | Pos      | Pos      | Pos      |

|                |          |     |     |     |
|----------------|----------|-----|-----|-----|
| CD86           | Variable | Pos | Pos | Pos |
| Class II (I-a) | Pos      | Pos | Pos | Pos |
