# Supplementary figures and images for: Survival signalling by Akt and eIF4E in oncogenesis and cancer therapy
Source: Springer Nature journal article supplement (doi:10.1038/nature02369), 2004-03-01

# SUPPLEMENTARY FIGURE 1

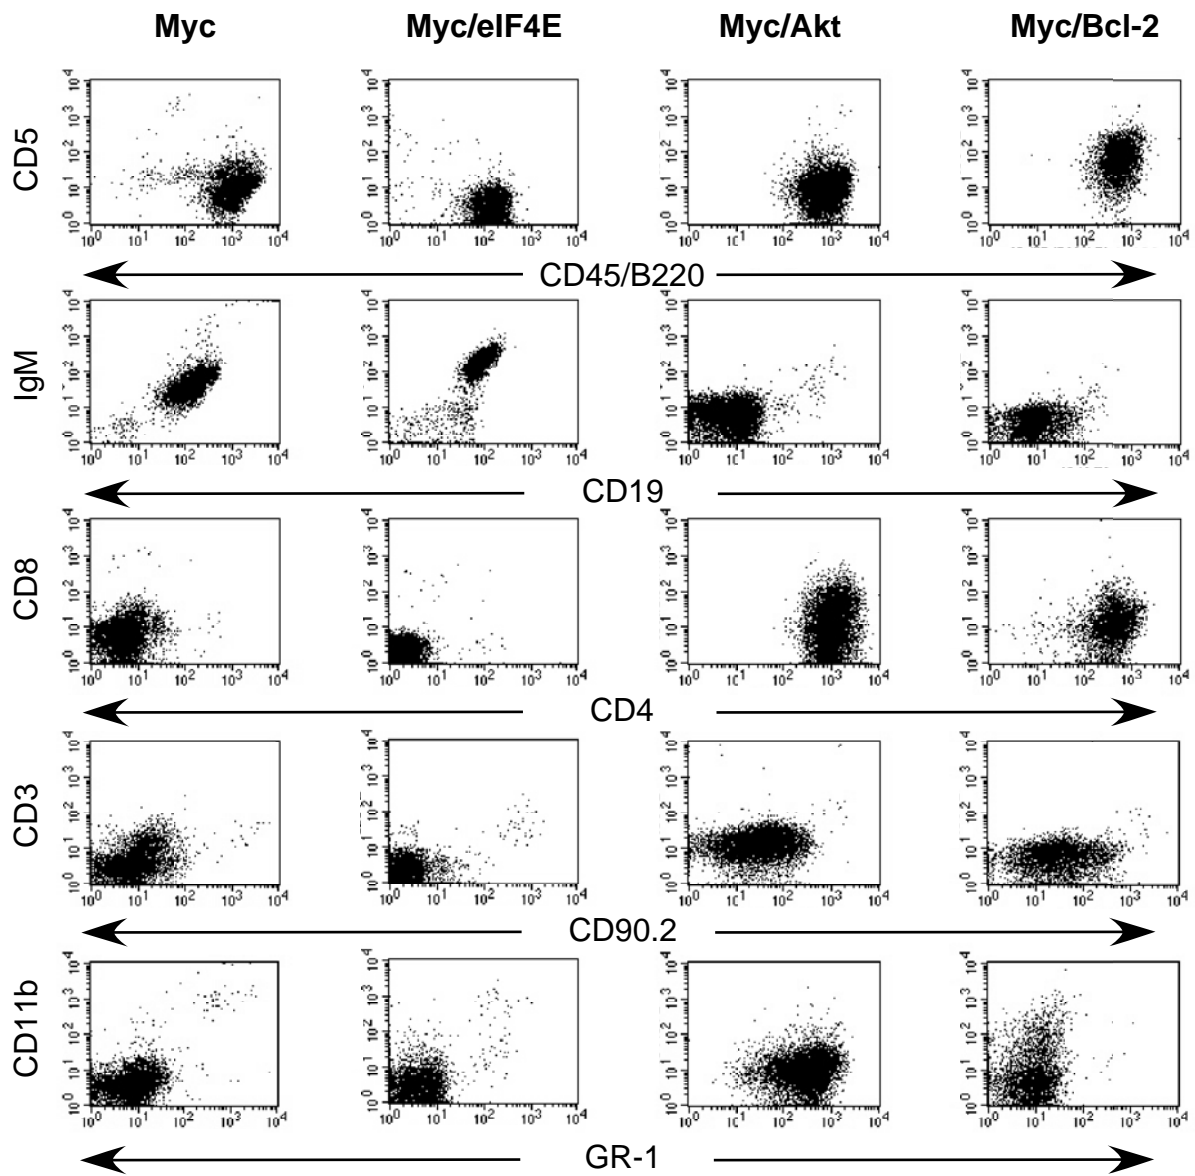

Supplement: 41586_2004_BFnature02369_MOESM1_ESM.pdf [file 41586_2004_BFnature02369_MOESM1_ESM.pdf]

# SUPPLEMENTARY FIGURE 2

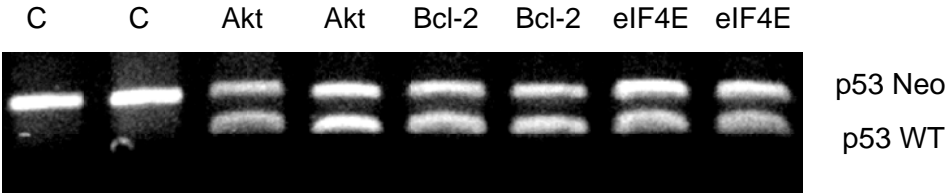

Supplement: 41586_2004_BFnature02369_MOESM2_ESM.pdf [file 41586_2004_BFnature02369_MOESM2_ESM.pdf]

# SUPPLEMENTARY FIGURE 3

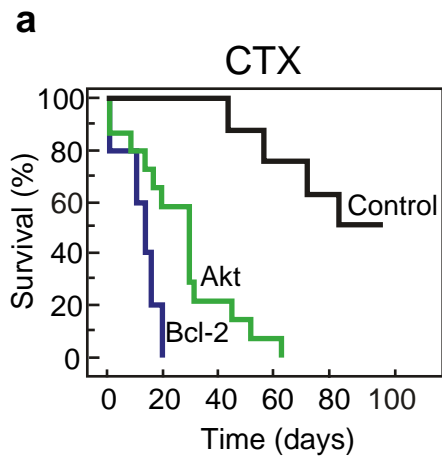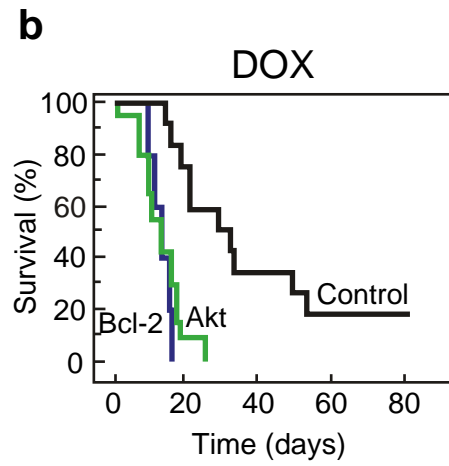

Supplement: 41586_2004_BFnature02369_MOESM3_ESM.pdf [file 41586_2004_BFnature02369_MOESM3_ESM.pdf]

# SUPPLEMENTARY FIGURE 4

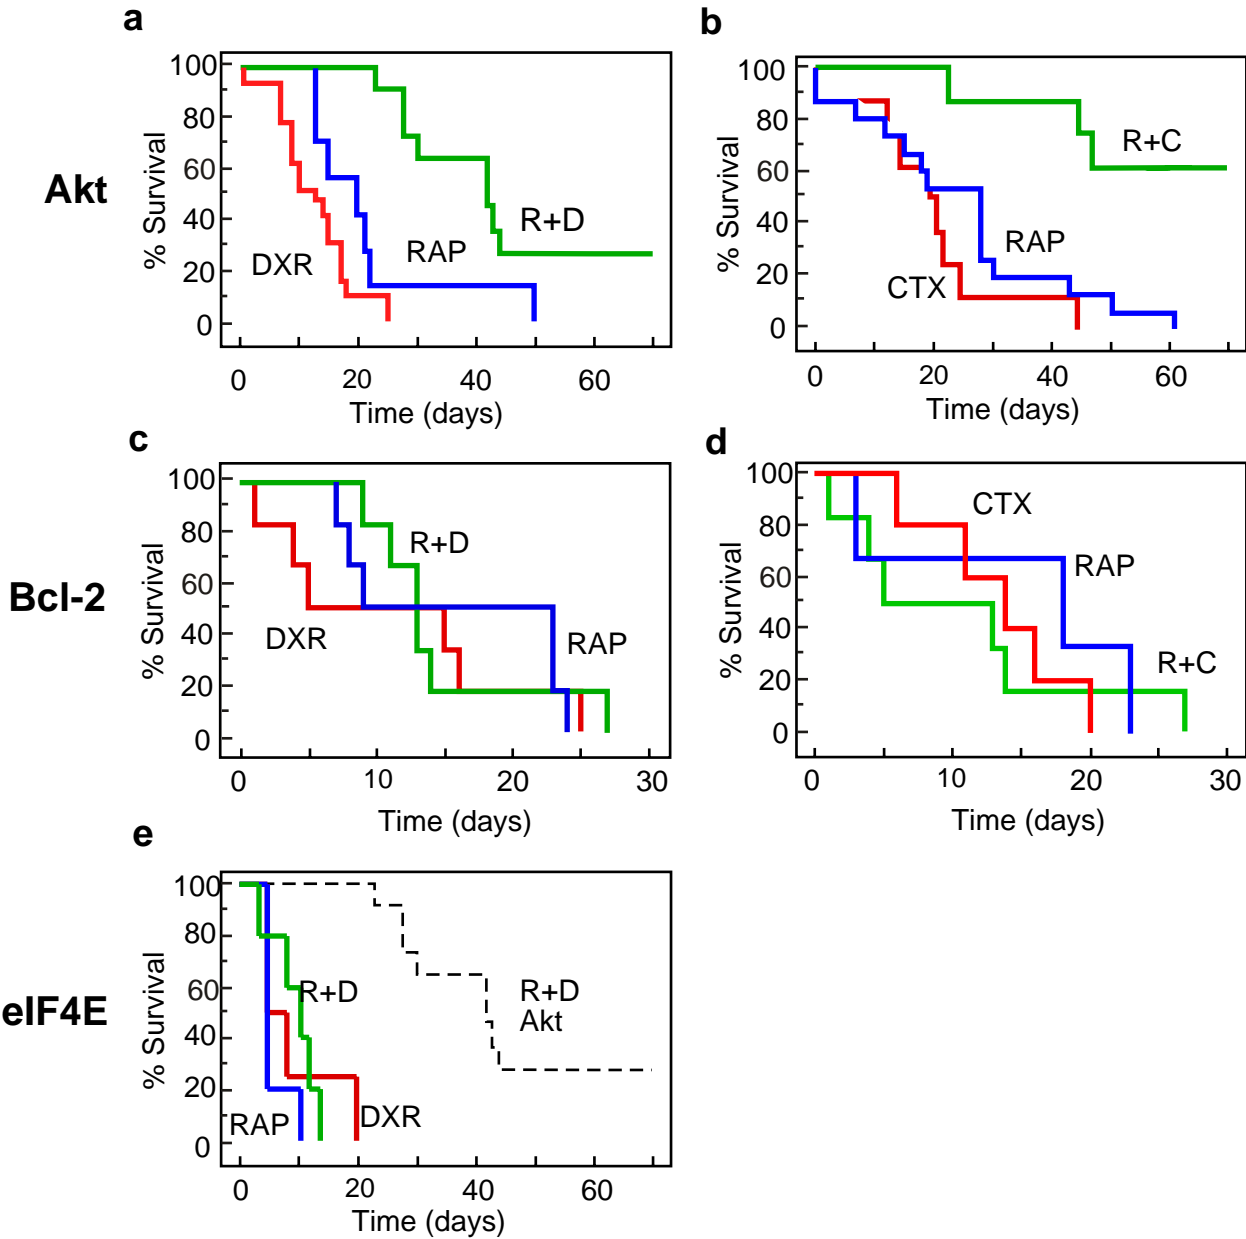

Supplement: 41586_2004_BFnature02369_MOESM4_ESM.pdf [file 41586_2004_BFnature02369_MOESM4_ESM.pdf]

# SUPPLEMENTARY FIGURE 5

**a**

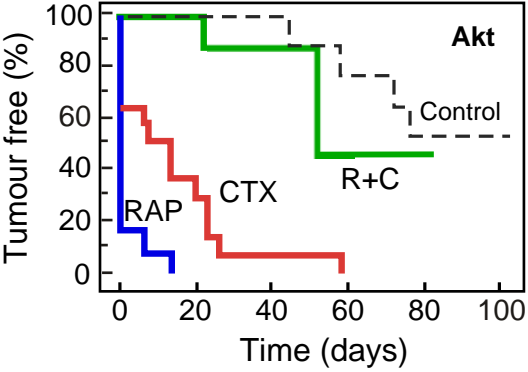

**b**

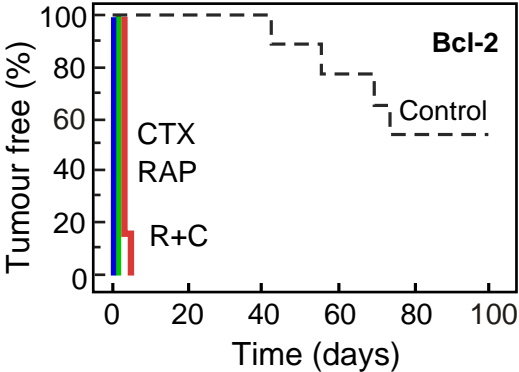

Supplement: 41586_2004_BFnature02369_MOESM5_ESM.pdf [file 41586_2004_BFnature02369_MOESM5_ESM.pdf]

# SUPPLEMENTARY FIGURE 6

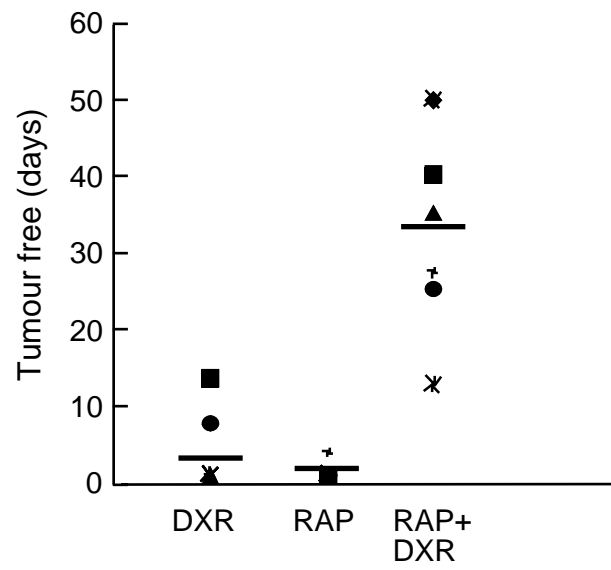

Supplement: 41586_2004_BFnature02369_MOESM6_ESM.pdf [file 41586_2004_BFnature02369_MOESM6_ESM.pdf]

# SUPPLEMENTARY FIGURE 7

**a**

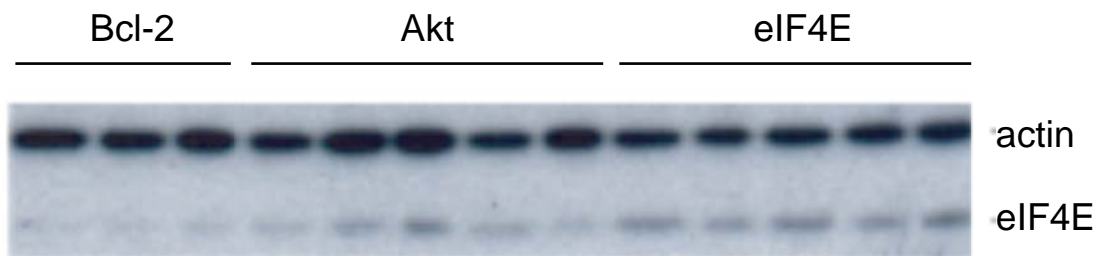

**b**

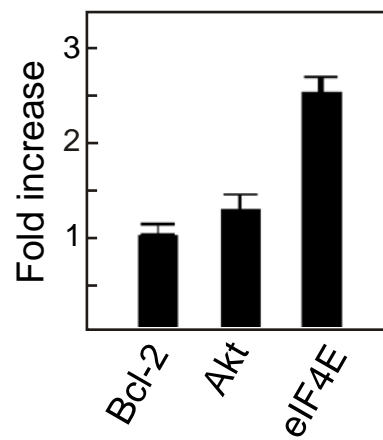

Supplement: 41586_2004_BFnature02369_MOESM7_ESM.pdf [file 41586_2004_BFnature02369_MOESM7_ESM.pdf]
